# Supplementary material for: Efficacy and Safety of Trametinib in Neurofibromatosis Type 1-Associated Plexiform Neurofibroma and Low-Grade Glioma: A Systematic Review and Meta-Analysis
Source: MDPI journal article supplement (doi:10.3390/ph15080956), 2022-07-31
Supplement: s1 [file s1]

**(A) PubMed search strategy**

#1 Trametinib  
#2 Neurofibromatosis type 1 [Title/Abstract]  
#3 NF1 [Title/Abstract]  
#4 #2 OR #3  
#5 plexiform neurofibroma [Title/Abstract]  
#6 pNF [Title/Abstract]  
#7 #5 OR #6  
#8 low-grade glioma [Title/Abstract]  
#9 LGG [Title/Abstract]  
#10 #8 OR #9  
#11 #7 OR #10  
#12 #1 AND #4 AND #11

**(B) Web of Science search strategy**

#1 (TS=(NF1)) OR TS=(neurofibromatosis type 1)  
#2 (TS=(pNF)) OR TS=(plexiform neurofibroma)  
#3 (TS=(LGG)) OR TS=(low-grade glioma)  
#4 TS=(Trametinib) AND #1 AND (#2 OR #3)

**(C) Embase search strategy**

#1 exp Trametinib/  
#2 exp Neurofibromatosis type 1/  
#3 exp NF1/  
#4 #2 OR #3  
#5 exp plexiform neurofibroma/  
#6 exp pNF/  
#7 #5 OR #6  
#8 exp low-grade glioma/  
#9 exp LGG/  
#10 #8 OR #9  
#11 #7 OR #10  
#12 #1 AND #4 AND #11

**Figure S1.** Searching Strategy. **(A)** PubMed search strategy; **(B)** Web of Science search strategy; **(C)** Embase search strategy.
